# Supplementary material for: Pervasive antagonistic interactions among hybrid incompatibility loci
Source: PLoS Genet. 2017 Jun 12;13(6):e1006817. doi: 10.1371/journal.pgen.1006817 (PMC5484531; doi:10.1371/journal.pgen.1006817)
Supplement: S2 Table — MasterOrder: Unique identifier of individual in experiment. Genotype: unique genotype ID (crossed LA accessions when DIL; LA4024 is lyc). Pollen: Proportion of fertile pollen (average of two technical replicates). AsinPollen: Arc-sine transformation of ‘Pollen’. Seed: Self-seed count (average of at least two fruits). Corrected seed: Seed phenotypes after pollen-correction (residuals, see main text). (XLSX) [file pgen.1006817.s002.xlsx]

## Sheet: Sheet 1
MasterOrder	Genotype	Pollen	aSinPollen	Seed	Corrected seed
831	LA4024	0.926822	1.29687	45	13.127
832	LA4024	0.95	1.34528
833	LA4024	0.863768	1.19276	50.5	14.3873
834	LA4024	0.863399	1.19222	60	16.0524
835	LA4024	0.785714	1.08952	71.5	18.199
838	LA4024	0.895765	1.24205	53.5	14.8051
839	LA4024	0.963488	1.37853	15	6.36204
840	LA4024	0.895238	1.24119
841	LA4024	0.689957	0.98025	34	11.7291
842	LA4024	0.895614	1.24181	62.5	16.3564
843	LA4024	0.933333	1.30964
844	LA4024	0.904234	1.25617	26	9.34936
845	LA4024	0.936058	1.31515	43	12.7055
846	LA4024			40.5	12.3446
847	LA4024	0.832151	1.14868	20	8.19855
848	LA4024			34	11.0463
849	LA4024	0.927743	1.29864
850	LA4024	0.92405	1.29159	63	16.321
1475	LA4024	0.960938	1.37184	63	16.1288
1476	LA4024	0.91791	1.28021	42	12.5981
1477	LA4024	0.821795	1.13499	48.5	14.1626
1478	LA4024	0.920635	1.28521	22	8.35483
1479	LA4024	0.941176	1.32582	32	10.4855
1480	LA4024	0.900177	1.24934	63	16.4222
1481	LA4024	0.957288	1.36263	29.5	9.86526
1482	LA4024	0.982169	1.43686	33.5	10.532
1483	LA4024	0.983249	1.44101	22.5	8.10012
1484	LA4024			28.5	9.88155
1485	LA4024	0.908166	1.26291	34	11.0519
1486	LA4024	0.815217	1.12645	25	9.4336
1487	LA4024	0.865605	1.19544
1488	LA4024	0.918038	1.28044	58.5	15.5845
1489	LA4024	0.994318	1.49535	57	14.811
1490	LA4024	0.969457	1.39513	59	15.3955
1491	LA4024	0.729599	1.02394	14	6.93808
1492	LA4024			53.5	14.7495
1385	LA3915	0.678293	0.967704	28	10.4849
1386	LA3915			14	7.35138
1387	LA3915	0.188889	0.449609	38.5	13.907
1388	LA3915	0.81106	1.12112	32	10.9759
1389	LA3915	0.491071	0.776469	30	11.377
1390	LA3915	0.654251	0.942208	41	13.2153
1391	LA3931	0.728788	1.02303	19	8.25185
1392	LA3931			21	8.66396
1393	LA3931	0.569167	0.854788	42	13.6173
1394	LA3931	0.891694	1.23545	17.5	7.36312
1395	LA3931	0.730864	1.02537	3	3.20597
1396	LA3931	0.82697	1.14179	30	10.5019
1397	LA3935	0.222222	0.490883	24	10.7266
1398	LA3935	0.848	1.1703	0	0.778677
1399	LA3935	0.700988	0.992235	31	11.0735
1400	LA3935	0.824561	1.13861	25.5	9.5181
1401	LA3935	0.216216	0.483624	5	5.34771
1402	LA3935	0.628834	0.915702	5	4.31262
1403	LA3939	0.466667	0.75204	12	7.02216
1404	LA3939	0.935431	1.31387	45	13.0862
1405	LA3939	0.916606	1.27784	18	7.38934
1406	LA3939	0.792892	1.09832	38.5	12.3529
1407	LA3939	0.847256	1.16927	17	7.39265
1408	LA3939	0.738636	1.03417	28.5	10.4351
1409	LA3943	0.813134	1.12378	22	8.74156
1410	LA3943	0.378118	0.662276	25.5	10.6592
1411	LA3943	0.809524	1.11916	0	0.901191
1412	LA3943			1	2.26235
1413	LA3943			28	10.4832
1414	LA3943			29	10.7015
1415	LA3947			34.5	11.6874
1416	LA3947	0.79661	1.10292	55.5	15.4901
1417	LA3947	0.84324	1.16372	73	18.2613
1418	LA3947	0.922057	1.28785	43	12.7709
1419	LA3947			49.5	14.5711
1420	LA3947	0.325837	0.607506	33	12.4152
1421	LA3948	0	0	50	17.1544
1422	LA3948	0.627907	0.914743	36.5	12.3943
1423	LA3948	0.701372	0.992655	41.5	13.1909
1424	LA3948	0.864398	1.19368	66	17.0543
1425	LA3948	0.78726	1.09141	70	17.9527
1426	LA3948	0.292683	0.571628	73.5	19.7594
1427	LA3950	0.586466	0.872301	18.5	8.48747
1428	LA3950	0.666667	0.955317	28.5	10.624
1429	LA3950	0.593985	0.879946	10.5	6.26931
1430	LA3950	0.471194	0.756577	5	4.69383
1431	LA3950	0.595238	0.881222	17	8.0827
1432	LA3950			0	1.50031
1433	LA3956	0.50833	0.793728	15	7.76301
1434	LA3956	0.77381	1.07516	8	5.00661
1435	LA3956	0.776755	1.07868	23	9.08574
1436	LA3956	0.806926	1.11586	40.5	12.7024
1437	LA3956	0.749571	1.0467	7	4.73409
1438	LA3956	0.720573	1.01384	16.5	7.63472
1439	LA3957	0.113095	0.342981	8	6.76062
1440	LA3957	0.862385	1.19075	38.5	12.1315
1441	LA3957	0.788077	1.09241	52	14.8969
1442	LA3957	0.90914	1.2646	32	10.6321
1443	LA3957	0.869608	1.20135	16	7.05391
1444	LA3957	0.803657	1.11174	14	6.72777
1445	LA3963	0.24063	0.512709	26	11.1304
1446	LA3963	0.275	0.552015	56	16.8971
1447	LA3963	0.353763	0.636992	19.5	9.30103
1448	LA3963	0.00666667	0.0817407	9	7.7132
1449	LA3963	0.569207	0.854828
1451	LA3964			20.5	8.39469
1452	LA3964	0.950101	1.34552	32.5	10.543
1453	LA3964	0.71754	1.01046	67.5	17.7397
1454	LA3964	0.930588	1.30419	29	9.89707
1455	LA3964	0.305556	0.585686	46	15.0174
1456	LA3964	0.949179	1.34341	72.5	17.751
1457	LA3968	0.738604	1.03414	38	12.4078
1458	LA3968	0.850962	1.17445	4	3.2886
1459	LA3968			37.5	12.3542
1460	LA3968	0.518333	0.803736	36	12.5596
1461	LA3968	0.566785	0.852383	47	14.5639
1462	LA3968	0.875571	1.21029	44.5	13.2405
1463	LA3975	0.839891	1.15913	53	14.9151
1464	LA3975	0.940789	1.325	81	19.1288
1465	LA3975	0.906281	1.25967	27	9.5646
1466	LA3975			60.5	16.3266
1467	LA3975	0.761364	1.06042	24.5	9.47741
1468	LA3975	0.476636	0.762025	19	8.87712
1469	LA3977			9.5	6.63264
1470	LA3977			14	7.95588
1471	LA3977	0.410891	0.695811	35.5	12.7169
1472	LA3977	0.795421	1.10145	0	0.943627
1473	LA3977	0	0	18	10.4506
851	LA3975xLA3968	0.558946	0.844481	0	1.55922
852	LA3975xLA3968	0.973684	1.40785	38	11.5125
853	LA3975xLA3968	0.93264	1.30825	84	19.6284
854	LA3975xLA3968			32	10.751
855	LA3975xLA3968			56.5	15.3959
856	LA3975xLA3968	0.928079	1.29929	39	11.97
857	LA3975xLA3964	0.630036	0.916947	43.5	13.7544
859	LA3975xLA3964			47.5	14.039
860	LA3975xLA3964	0.956897	1.36166	43	12.5941
861	LA3975xLA3964			81	19.6439
862	LA3975xLA3964	0.753637	1.05141	92	21.4429
863	LA3968xLA3964	0.626603	0.913394	90	21.4771
864	LA3968xLA3964	0.67305	0.962103	23.5	9.48182
865	LA3968xLA3964	0.937975	1.3191	52	14.3539
866	LA3968xLA3964	0.878303	1.21445	35	11.3728
867	LA3968xLA3964	0.837183	1.15545	43	13.0881
868	LA3968xLA3964	0.891753	1.23554	49.5	14.1038
869	LA3968xLA3957	0.76	1.05882	39.5	12.6441
870	LA3968xLA3957			19.5	7.82313
871	LA3968xLA3957			50	14.1505
872	LA3968xLA3957	0.819592	1.13212	57	15.6811
874	LA3968xLA3957	1	1.5708	34.5	10.417
882	LA3975xLA3947	0.914977	1.27491	27	9.52808
883	LA3975xLA3947			37.5	11.6009
884	LA3975xLA3947			8.5	4.5624
885	LA3975xLA3947	0.965507	1.38399	23	8.35435
886	LA3975xLA3947			37	11.5011
887	LA3968xLA3947	0.895652	1.24187	64	16.6072
889	LA3968xLA3947	0.805618	1.11421	26	9.68944
891	LA3968xLA3947	0.934211	1.3114	38	11.7435
892	LA3968xLA3947	0.807345	1.11639
893	LA3964xLA3947	0.631134	0.918084	88	21.1672
894	LA3964xLA3947	0.709656	1.00174	53	15.2922
895	LA3964xLA3947	0.964286	1.38067	67	16.7709
896	LA3964xLA3947			11	6.07798
897	LA3964xLA3947	0.460891	0.74625	71	18.9409
898	LA3964xLA3947	0.767429	1.06757	76.5	19.0456
899	LA3957xLA3947	0.876126	1.21114	40.5	12.4742
900	LA3957xLA3947	0.79994	1.10707	34.5	11.5279
901	LA3957xLA3947	0.405051	0.689869	62	17.5945
902	LA3957xLA3947	0.54557	0.831031	67.5	18.1696
903	LA3957xLA3947	0.865254	1.19493	35.5	11.5212
904	LA3957xLA3947	0.754307	1.05219	25	9.61152
905	LA3956xLA3975	0.45122	0.73654	10.5	6.61286
906	LA3956xLA3975	0.861789	1.18988	25	9.28165
907	LA3956xLA3975	0.83517	1.15273	27	9.82077
908	LA3956xLA3975	0.886752	1.22757	21.5	8.37349
909	LA3956xLA3975	0.941652	1.32683	20	7.77176
910	LA3956xLA3975	0.858441	1.18506	23.5	8.9477
911	LA3935xLA3975	0.94	1.32333
912	LA3935xLA3975			0.5	1.20259
916	LA3935xLA3975	0.861386	1.1893
917	LA3963xLA3975	0	0	7	7.24158
918	LA3963xLA3975	0.417281	0.702297	52	15.8315
920	LA3963xLA3975	0.311927	0.592581	8	6.16268
921	LA3963xLA3975			19	9.17967
922	LA3963xLA3975	0.899405	1.24806	26.5	9.48096
923	LA3948xLA3975	0.210526	0.47668	63	18.2732
924	LA3948xLA3975	0.505051	0.790449	47.5	14.8045
925	LA3948xLA3975	0.751736	1.0492	39	12.5691
926	LA3948xLA3975			46	14.0213
927	LA3948xLA3975	0.967391	1.38922	43.5	12.623
928	LA3948xLA3975	0.929412	1.30188	67.5	17.0416
929	LA3956xLA3968	0.171247	0.426647	33	12.8485
930	LA3956xLA3968	0.91358	1.27242	4	3.0539
931	LA3956xLA3968	0.591017	0.876925	10	6.12309
932	LA3956xLA3968			37.5	12.5904
933	LA3956xLA3968	0.420704	0.705766	43	14.1653
934	LA3956xLA3968	0.928571	1.30025	14	6.27617
935	LA3950xLA3968	0.410127	0.695034	15.5	8.13386
936	LA3950xLA3968	0.544803	0.830261	15	7.67549
937	LA3950xLA3968	0.595975	0.881973
939	LA3950xLA3968	0.26936	0.545679	54	16.5616
940	LA3950xLA3968	0.432432	0.717623	25	10.413
943	LA3963xLA3968			19	9.01306
944	LA3963xLA3968	0.407554	0.692417	9	6.25026
945	LA3963xLA3968	0.396104	0.680739	49	15.342
946	LA3963xLA3968	0.457341	0.742688	40.5	13.5964
947	LA3948xLA3968	0.554169	0.839674	34.5	12.1685
948	LA3948xLA3968	0.678571	0.968002	59	16.4187
949	LA3948xLA3968	0.664683	0.953214	35.5	12.1003
950	LA3948xLA3968	0.923933	1.29137	61	15.9847
951	LA3948xLA3968	0.876294	1.21139	1	1.68025
952	LA3948xLA3968	0.526667	0.812077	17.5	8.37735
953	LA3956xLA3964	0.823188	1.13681	16.5	7.34012
954	LA3956xLA3964	0.732692	1.02743	47	14.1446
955	LA3956xLA3964	0.0552738	0.237325
956	LA3956xLA3964	0.369565	0.653437	42.5	14.1954
957	LA3956xLA3964	0.833333	1.15026	16.5	7.3079
958	LA3956xLA3964	0.541667	0.827113	49	14.9913
959	LA3935xLA3964			1	2.80721
961	LA3935xLA3964	0.149184	0.396555	10	7.27387
962	LA3935xLA3964	0.585639	0.871462	0	1.49459
964	LA3935xLA3964	0.666247	0.954872	16	7.64437
965	LA3950xLA3964	0.365862	0.649597	0.5	2.65605
966	LA3950xLA3964	0.788753	1.09323	59.5	16.2042
967	LA3950xLA3964	0.698113	0.9891	15	7.29497
968	LA3950xLA3964	0.732394	1.0271	32	11.2011
969	LA3950xLA3964	0.57152	0.857164	9.5	6.01439
970	LA3950xLA3964	0.568703	0.85432	13	7.06443
971	LA3963xLA3964	0.363636	0.647285	5.5	5.14747
972	LA3963xLA3964	0.464376	0.749744	23	9.87376
973	LA3963xLA3964	0.732481	1.02719	10	5.7631
974	LA3963xLA3964	0.717391	1.0103	31.5	11.1361
975	LA3963xLA3964	0.668685	0.957459	28.5	10.6189
976	LA3963xLA3964			29.5	11.0253
977	LA3948xLA3964	0.404762	0.689575	44	14.3937
978	LA3948xLA3964	0.892045	1.23601	7.5	4.45281
979	LA3948xLA3964	0.892857	1.23732	65	16.7844
980	LA3948xLA3964	0.848873	1.17152	32.5	10.9599
981	LA3948xLA3964	0.945946	1.33615	69.5	17.2854
982	LA3948xLA3964	0.862282	1.1906	67	17.2262
989	LA3935xLA3957	0.906665	1.26033	45	13.2145
990	LA3935xLA3957	0.929825	1.30269	7.5	4.29308
991	LA3935xLA3957			7.5	4.33458
992	LA3935xLA3957			46.5	13.4341
993	LA3935xLA3957			62.5	16.252
994	LA3935xLA3957	0.924838	1.29308	54	14.7712
995	LA3950xLA3957	0.64515	0.932668	39	12.8483
996	LA3950xLA3957	0.942752	1.32919	33	10.6863
997	LA3950xLA3957	0.916084	1.2769	24	8.84365
998	LA3950xLA3957	0.886156	1.22663	18.5	7.63862
999	LA3950xLA3957	0.551498	0.836988	29	11.0163
1000	LA3950xLA3957	0.714118	1.00667	25	9.72057
1001	LA3963xLA3957	0.75641	1.05463	3	3.13587
1002	LA3963xLA3957	0.270833	0.547339	1.5	3.58143
1003	LA3963xLA3957	0.936177	1.3154
1004	LA3963xLA3957	0.413793	0.698758	24.5	10.3438
1005	LA3963xLA3957	0.408929	0.693816	17.5	8.66066
1006	LA3963xLA3957	0.0416667	0.205569	49.5	16.5713
1007	LA3948xLA3957	0.965364	1.3836	3	2.34779
1008	LA3948xLA3957	0.522409	0.807815	61	17.1431
1009	LA3948xLA3957	0.819846	1.13245	80.5	19.513
1010	LA3948xLA3957	0.333333	0.61548	44	14.5712
1011	LA3948xLA3957			6.5	4.54622
1012	LA3948xLA3957	0.9375	1.31812	70	17.4096
1013	LA3956xLA3947	0.12931	0.367836	21	10.3127
1014	LA3956xLA3947	0.117909	0.350512	30	12.3975
1015	LA3956xLA3947	0.386364	0.67076	10	6.61698
1016	LA3956xLA3947	0.698795	0.989843	14.5	7.15727
1017	LA3956xLA3947	0.237705	0.509281	1	3.36223
1018	LA3956xLA3947	0.796703	1.10304	17.5	7.68031
1019	LA3935xLA3947			38.5	12.4316
1020	LA3935xLA3947	0.919064	1.28232	16.5	6.99154
1022	LA3935xLA3947	0.693318	0.983889	29.5	10.7726
1024	LA3935xLA3947	0.642857	0.930274	7.5	5.18524
1025	LA3950xLA3947	0.633751	0.920798	2	2.9638
1026	LA3950xLA3947	0.220998	0.489409	3	4.48992
1027	LA3950xLA3947	0.554416	0.839922	2.5	3.41216
1028	LA3950xLA3947	0.230263	0.500492	6.5	5.8662
1029	LA3950xLA3947	0.707692	0.999581	4	3.70751
1030	LA3950xLA3947	0.133333	0.373792	4.5	5.41249
1031	LA3963xLA3947	0.113333	0.343357	42.5	14.9382
1032	LA3963xLA3947	0.00934579	0.0968249	19.5	10.5951
1033	LA3963xLA3947	0.331909	0.613968	16.5	8.59265
1034	LA3963xLA3947	0.0108696	0.104447	49.5	16.8135
1035	LA3963xLA3947	0.279447	0.556983	23	10.3355
1036	LA3963xLA3947	0.452008	0.737333	48.5	15.1152
1037	LA3948xLA3947	0.333585	0.615747	16.5	8.58839
1038	LA3948xLA3947	0.3125	0.5932	24	10.4815
1040	LA3948xLA3947	0.741176	1.03707	72.5	18.4849
1041	LA3948xLA3947	0.285714	0.563943	27.5	11.3421
1042	LA3948xLA3947	0.803485	1.11152	54	15.2061
1043	LA3950xLA3956	0.701532	0.992829	6.5	4.68675
1044	LA3950xLA3956	0.713675	1.00618	5.5	4.2877
1048	LA3950xLA3956	0.597549	0.883577	13.5	7.13521
1049	LA3963xLA3956	0.191515	0.452955	19.5	9.74191
1050	LA3963xLA3956	0.811893	1.12219	13.5	6.56359
1051	LA3963xLA3956	0.258787	0.533687	12	7.54525
1052	LA3963xLA3956	0.37037	0.654271	25	10.5648
1053	LA3963xLA3956	0.217059	0.484647	6.5	5.90416
1054	LA3963xLA3956	0.184218	0.443614	0	2.51955
1055	LA3948xLA3956	0.805869	1.11453	54.5	15.287
1056	LA3948xLA3956	0.880411	1.21769	82.5	19.6163
1057	LA3948xLA3956	0.751292	1.04869	41.5	13.0567
1058	LA3948xLA3956	0.785941	1.0898	46	13.8098
1059	LA3948xLA3956	0.915897	1.27656	42	12.6069
1060	LA3948xLA3956	0.861971	1.19015	44.5	13.2887
1061	LA3948xLA3935	0.970504	1.3982	39.5	11.8311
1062	LA3948xLA3935			96.5	21.6245
1063	LA3948xLA3935	0.895921	1.24231	37.5	11.8097
1064	LA3948xLA3935	0.910714	1.26735	16	6.89579
1065	LA3948xLA3935	0.927618	1.2984	14	6.28059
1066	LA3948xLA3935	0.750543	1.04782	63	16.905
1067	LA3963xLA3950	0.745743	1.0423	10	5.72692
1068	LA3963xLA3950	0.640351	0.927661	21	8.97162
1070	LA3963xLA3950	0.381188	0.665439	14	7.79692
1071	LA3963xLA3950	0.0473373	0.219325	14	8.86564
1072	LA3963xLA3950	0.520089	0.805493	0	1.65262
1073	LA3948xLA3950	0.413004	0.697957
1074	LA3948xLA3950	0.816901	1.12863	17.5	7.61902
1075	LA3948xLA3950	0.601683	0.887795	7	5.11476
1076	LA3948xLA3950	0.677489	0.966844	27	10.2661
1077	LA3948xLA3950	0.788889	1.0934	14.5	6.90919
1078	LA3948xLA3950	0.794872	1.10077	36.5	11.9487
1079	LA3948xLA3963	0.125241	0.361732	19.5	9.96045
1080	LA3948xLA3963	0.812842	1.1234	39	12.3913
1081	LA3948xLA3963	0.528812	0.814226
1082	LA3948xLA3963	0.530799	0.816217	36	12.5297
1083	LA3948xLA3963	0.523021	0.808427
1084	LA3948xLA3963	0.712338	1.0047	38	12.4783
1085	LA3975xLA3931	0.685498	0.975439	9	5.57225
1086	LA3975xLA3931	0.890566	1.23364	7.5	4.4585
1087	LA3975xLA3931	0.682679	0.972407	19	8.37313
1088	LA3975xLA3931	0.643089	0.930516	21	8.96478
1089	LA3975xLA3931	0.345794	0.628637	0	2.0763
1090	LA3975xLA3931	0	0	32.5	13.7664
1091	LA3968xLA3931	0.469697	0.755077	20	9.14146
1092	LA3968xLA3931	0.238095	0.50974	69	19.184
1093	LA3968xLA3931	0.87585	1.21072	10	5.32345
1094	LA3968xLA3931	0.119048	0.352274	17	9.34985
1095	LA3968xLA3931	0.838542	1.15729	21.5	8.54185
1096	LA3968xLA3931	0.74053	1.03633	23.5	9.304
1097	LA3964xLA3931	0.577381	0.863091	23	9.60222
1098	LA3964xLA3931	0.85662	1.18245	26.5	9.63812
1099	LA3964xLA3931	0.931438	1.30586	45.5	13.199
1100	LA3964xLA3931	0.792799	1.09821	47	13.975
1101	LA3964xLA3931	0.478846	0.764238	25.5	10.415
1102	LA3964xLA3931	0.812057	1.1224	58.5	15.9631
1103	LA3957xLA3931			21	8.42232
1104	LA3957xLA3931	0.875146	1.20965	19	7.80479
1105	LA3957xLA3931	0.881522	1.2194	32.5	10.8451
1106	LA3957xLA3931	0.779412	1.08188	55	15.453
1107	LA3957xLA3931	0.880571	1.21793	63.5	16.5811
1108	LA3957xLA3931	0.757499	1.0559	9	5.37949
1109	LA3947xLA3931	0.0964539	0.315793	38	14.1286
1111	LA3947xLA3931	0.217767	0.485505
1112	LA3947xLA3931	0.637822	0.925027	45	14.0178
1114	LA3947xLA3931	0.768571	1.06892	21.5	8.75356
1121	LA3950xLA3931	0.422732	0.707819
1122	LA3950xLA3931	0.212714	0.479358	2	4.02132
1127	LA3963xLA3931	0.229705	0.499829	17.5	9.12537
1128	LA3963xLA3931	0.181694	0.44035	24.5	10.9629
1129	LA3963xLA3931	0.02	0.141897	25.5	11.9058
1130	LA3963xLA3931	0.568004	0.853614	43	13.8111
1131	LA3963xLA3931	0.694406	0.985069	17	7.83392
1132	LA3963xLA3931	0.370588	0.654496	9.5	6.4999
1133	LA3948xLA3931	0.718219	1.01122	58.5	16.2295
1134	LA3948xLA3931			47	14.4386
1135	LA3948xLA3931	0.911704	1.26909	72.5	17.929
1136	LA3948xLA3931	0.720942	1.01425	32.5	11.3366
1137	LA3948xLA3931	0.50979	0.795188	15.5	7.89393
1138	LA3948xLA3931	0.176692	0.433828	42	14.6258
1139	LA3975xLA3939	0.895658	1.24188	31	10.4755
1140	LA3975xLA3939	0.892857	1.23732	63	16.451
1141	LA3975xLA3939			64.5	16.5733
1142	LA3975xLA3939			29	9.92919
1143	LA3975xLA3939			23	8.57764
1144	LA3975xLA3939	0.96877	1.39314	66	16.5765
1145	LA3968xLA3939	0.944883	1.33381	34.5	10.9847
1147	LA3968xLA3939	0.968235	1.39161	31.5	10.2226
1148	LA3968xLA3939	0.475997	0.761386	58	16.742
1149	LA3968xLA3939	0.875	1.20943	70.5	17.7507
1150	LA3968xLA3939	0.878947	1.21544	55.5	15.2205
1151	LA3964xLA3939			92	21.061
1153	LA3964xLA3939	0.861313	1.1892	104	22.8485
1154	LA3964xLA3939			44	13.1449
1155	LA3964xLA3939	0.886619	1.22736	50	14.2141
1156	LA3964xLA3939	0.879322	1.21601	31.5	10.6433
1157	LA3957xLA3939	0.824219	1.13816	0	0.855672
1158	LA3957xLA3939	0.838294	1.15696	44	13.274
1159	LA3957xLA3939	0.703364	0.994833	64	17.199
1160	LA3957xLA3939			61.5	16.3077
1161	LA3957xLA3939	0.94886	1.34268	26.5	9.25427
1162	LA3957xLA3939	0.941464	1.32643	28	9.62553
1163	LA3947xLA3939	0.729314	1.02362	75	18.9145
1164	LA3947xLA3939	0.734749	1.02976	19.5	8.36011
1165	LA3947xLA3939	0.574561	0.860239	9	5.84822
1166	LA3947xLA3939	0.829678	1.14538	25.5	9.50189
1167	LA3947xLA3939	0.623288	0.909971	45.5	14.1474
1168	LA3947xLA3939	0.562112	0.847671	18.5	8.54648
1169	LA3956xLA3939	0.765224	1.06496	20	8.3991
1170	LA3956xLA3939	0.348315	0.631284	2.5	3.91198
1171	LA3956xLA3939	0.636218	0.92336	24	9.69059
1172	LA3956xLA3939	0.363733	0.647385	12	7.27287
1173	LA3956xLA3939	0.872211	1.20523	37	11.7987
1174	LA3956xLA3939	0.333333	0.61548
1175	LA3935xLA3939	0.256155	0.530678	0	2.31097
1176	LA3935xLA3939	0.625939	0.912708	0.5	2.02574
1177	LA3935xLA3939	0.757924	1.0564	2	2.63896
1178	LA3935xLA3939	0.486486	0.771883	0	1.73314
1179	LA3935xLA3939			22.5	9.36542
1180	LA3935xLA3939	0.924528	1.2925	5	3.40997
1181	LA3950xLA3939	0.414508	0.699484	10.5	6.70163
1182	LA3950xLA3939			19	8.6801
1183	LA3950xLA3939	0.667173	0.955854	12.5	6.6785
1184	LA3950xLA3939	0.489412	0.774809	17.5	8.46663
1185	LA3950xLA3939	0.621241	0.907859	23	9.49497
1186	LA3950xLA3939	0.59731	0.883333	13	6.99492
1187	LA3963xLA3939	0.157139	0.4076	34.5	13.2035
1188	LA3963xLA3939	0.325243	0.606872	39	13.6288
1189	LA3963xLA3939	0.874777	1.20909	21	8.29742
1190	LA3963xLA3939	0.345649	0.628484	12	7.31815
1191	LA3963xLA3939	0.352567	0.63574	45.5	14.8043
1192	LA3963xLA3939	0.295222	0.574415	6	5.50812
1193	LA3948xLA3939	0.915147	1.27522	43.5	12.8961
1194	LA3948xLA3939	0.69578	0.986562	54	15.5055
1195	LA3948xLA3939	0.93956	1.32241	52.5	14.4351
1196	LA3948xLA3939	0.851714	1.1755	26.5	9.65477
1197	LA3948xLA3939	0.37633	0.660431	43.5	14.3689
1198	LA3948xLA3939	0.901515	1.25158	61	16.08
1199	LA3931xLA3939	0.694643	0.985326	65	17.388
1200	LA3931xLA3939	0.597568	0.883597	18	8.3338
1201	LA3931xLA3939	0.782805	1.08599	22.5	8.95061
1202	LA3931xLA3939	0.303922	0.583911	7.5	6.015
1203	LA3931xLA3939	0.86579	1.19572	14.5	6.66408
1204	LA3931xLA3939	0.787546	1.09176	9	5.2936
1205	LA3975xLA3943			15	7.02116
1206	LA3975xLA3943			38	12.2418
1207	LA3975xLA3943	0.79	1.09476	54.5	15.3343
1208	LA3975xLA3943			43	13.2128
1210	LA3975xLA3943	0.803896	1.11204
1217	LA3947xLA3943	0.79424	1.09999	49	14.3376
1218	LA3947xLA3943			76	19.2515
1219	LA3947xLA3943	0.81875	1.13102	45.5	13.6178
1220	LA3947xLA3943	0.860931	1.18864	14	6.54353
1221	LA3947xLA3943	0.751351	1.04876	20	8.43791
1222	LA3947xLA3943	0.0740691	0.275633	45	15.5735
1223	LA3956xLA3943	0.705952	0.99767	17	7.80373
1224	LA3956xLA3943	0.575	0.860682	28.5	10.8507
1225	LA3956xLA3943	0.731245	1.0258	16	7.47446
1226	LA3956xLA3943	0.759783	1.05857	0	1.04635
1227	LA3956xLA3943	0.738095	1.03356	11.5	6.20113
1228	LA3956xLA3943			54	15.4846
1229	LA3948xLA3943	0.73393	1.02883	50.5	14.78
1230	LA3948xLA3943	0.705839	0.997545	16.5	7.67375
1231	LA3948xLA3943	0.958651	1.36602	20.5	7.80017
1232	LA3948xLA3943	0.866246	1.19639	7.5	4.54774
1233	LA3948xLA3943	0.692803	0.98333	52.5	15.2474
1234	LA3948xLA3943	0.730769	1.02526	31.5	11.1002
1235	LA3931xLA3943	0.202299	0.466515	2	4.05208
1236	LA3931xLA3943	0.705983	0.997703	30.5	10.954
1237	LA3931xLA3943	0.849819	1.17284	46	13.6108
1238	LA3931xLA3943	0.79386	1.09952	7.5	4.7798
1239	LA3931xLA3943	0.855367	1.18067	17	7.36534
1240	LA3931xLA3943	0.444444	0.729728	29.5	11.3814
1241	LA3939xLA3943	0.736048	1.03123	22.5	9.08178
1244	LA3939xLA3943	0.513342	0.798741	21.5	9.40081
1245	LA3939xLA3943	0.641071	0.928412	29	10.7973
1246	LA3939xLA3943	0.698128	0.989115	86	20.6962
1247	LA3975xLA3915	0.346667	0.629554	51	15.8266
1248	LA3975xLA3915	0.923194	1.28998
1249	LA3975xLA3915	0.396226	0.680865	17	8.56267
1250	LA3975xLA3915	0.890947	1.23425	62	16.2904
1251	LA3975xLA3915	0.825137	1.13937	57.5	15.7502
1252	LA3975xLA3915	0.126984	0.364357	36.5	13.7129
1253	LA3968xLA3915	0.619718	0.906291	22	9.26257
1254	LA3968xLA3915	0.487179	0.772576	63	17.5644
1255	LA3968xLA3915	0.951677	1.34916	30	10.0051
1256	LA3968xLA3915	0.676923	0.966238	60	16.5937
1257	LA3968xLA3915	0.773226	1.07446	60.5	16.4195
1258	LA3968xLA3915	0.602448	0.888577	2.5	3.2956
1259	LA3964xLA3915	0.972973	1.40565	34.5	10.8126
1260	LA3964xLA3915			25	9.51357
1261	LA3964xLA3915	0.834755	1.15217	83	19.8498
1262	LA3964xLA3915	0.400585	0.685316	12	7.182
1263	LA3964xLA3915	0.817308	1.12915	46	13.7155
1264	LA3964xLA3915			46.5	13.8948
1265	LA3957xLA3915	0.0371901	0.194063	39	14.6177
1266	LA3957xLA3915	0.563473	0.849043	46.5	14.4794
1267	LA3957xLA3915			11	6.67673
1268	LA3957xLA3915	0.911199	1.26821	77	18.6434
1269	LA3957xLA3915			51.5	15.5728
1270	LA3957xLA3915	0.495	0.780398	19.5	8.95749
1271	LA3947xLA3915	0.923077	1.28976	37	11.5962
1272	LA3947xLA3915	0.828704	1.14408	39.5	12.4399
1273	LA3947xLA3915	0.790123	1.09491	15	7.04148
1274	LA3947xLA3915	0.757009	1.05533	7	4.71342
1275	LA3947xLA3915	0.909091	1.26452	12	5.79446
1276	LA3947xLA3915	0.419192	0.704234	2.5	3.73722
1277	LA3956xLA3915	0.879823	1.21678	0	0.667331
1278	LA3956xLA3915	0.118923	0.352082	3	4.81891
1279	LA3956xLA3915	0.615942	0.902405	1.5	2.73083
1280	LA3956xLA3915	0.408759	0.693643	8	5.92057
1281	LA3956xLA3915	0.422414	0.707497	0	1.88738
1282	LA3956xLA3915	0.758562	1.05714	4	3.56961
1288	LA3935xLA3915			20.5	8.82395
1289	LA3950xLA3915	0.647138	0.934747	0	1.34298
1290	LA3950xLA3915	0.613636	0.900036	0	1.42613
1291	LA3950xLA3915			4	4.01461
1292	LA3950xLA3915	0.596721	0.882733	0	1.46759
1293	LA3950xLA3915	0.383987	0.668318	0	1.98124
1294	LA3950xLA3915	0.681453	0.971091	5	4.17993
1295	LA3963xLA3915	0.491803	0.777201	33.5	12.1123
1296	LA3963xLA3915	0.742649	1.03875	35.5	11.8954
1297	LA3963xLA3915	0.579908	0.865651	21.5	9.24052
1298	LA3963xLA3915	0.775866	1.07762	49	14.3912
1299	LA3963xLA3915	0.863248	1.192	41.5	12.7134
1300	LA3963xLA3915	0.626168	0.912945	26.5	10.2838
1301	LA3948xLA3915	0.977398	1.41988	85	19.5129
1302	LA3948xLA3915	0.822552	1.13598	25	9.41079
1303	LA3948xLA3915	0.835435	1.15309	84	20.0001
1304	LA3948xLA3915	0.592607	0.878543	35	12.1775
1305	LA3948xLA3915	0.654744	0.942725	32	11.4032
1306	LA3948xLA3915	0.557048	0.842571	66	17.8954
1307	LA3931xLA3915	0.441103	0.726364	43.5	14.2109
1308	LA3931xLA3915	0.681452	0.971089	36	12.1586
1309	LA3931xLA3915	0.577694	0.863409	25.5	10.1774
1310	LA3931xLA3915			4.5	4.3532
1311	LA3931xLA3915	0.741681	1.03764	29.5	10.6438
1312	LA3931xLA3915	0.214354	0.481359	41.5	14.4158
1313	LA3939xLA3915	0.859626	1.18676	24	9.05959
1314	LA3939xLA3915	0.784896	1.08852	38	12.2775
1315	LA3939xLA3915	0.248869	0.522292	0	2.33106
1316	LA3939xLA3915	0.66636	0.954991	36	12.1972
1317	LA3939xLA3915	0.894256	1.23959	11	5.55878
1318	LA3939xLA3915	0.6	0.886077	24.5	9.89507
1325	LA3968xLA3977	0.512821	0.79822	25	10.2199
1326	LA3968xLA3977	0.384615	0.668964	63	17.8126
1327	LA3968xLA3977			0	1.82487
1328	LA3968xLA3977			22	9.67629
1329	LA3968xLA3977			19	8.94524
1330	LA3968xLA3977			0	1.82487
1331	LA3964xLA3977	0.701149	0.992411	0	1.20484
1332	LA3964xLA3977	0.290541	0.569271	28	11.4394
1333	LA3964xLA3977	0.785836	1.08967	19	8.09221
1334	LA3964xLA3977	0.473536	0.758922	8	5.76419
1335	LA3964xLA3977			31	11.3515
1336	LA3964xLA3977	0.681159	0.970775	1.5	2.56704
1337	LA3956xLA3977	0.611458	0.8978	0	1.43149
1338	LA3956xLA3977	0.468254	0.753631	14	7.58565
1339	LA3956xLA3977	0.909091	1.26452	6	3.8549
1340	LA3956xLA3977	0.771494	1.07239	1.5	2.3236
1341	LA3956xLA3977	0.284853	0.562989	2.5	4.07558
1342	LA3956xLA3977	0.830508	1.14648	3	2.91582
1343	LA3935xLA3977	0.794521	1.10033	16	7.2959
1344	LA3935xLA3977	0.464177	0.749545	10.5	6.5817
1345	LA3935xLA3977	0.793744	1.09937	6.5	4.43151
1346	LA3935xLA3977	0.682445	0.972156	8.5	5.41834
1348	LA3935xLA3977	0.722515	1.016	24	9.46866
1349	LA3950xLA3977	0.118035	0.350708
1350	LA3950xLA3977			7.5	5.76611
1351	LA3950xLA3977	0.930794	1.30459	11.5	5.55183
1353	LA3950xLA3977	0.143051	0.387873	0	2.65308
1354	LA3950xLA3977	0.422945	0.708035	1	2.88609
1355	LA3963xLA3977			0	2.14741
1356	LA3963xLA3977			0	2.14741
1357	LA3963xLA3977	0.592949	0.878891	4.5	4.20247
1358	LA3963xLA3977	0.154127	0.403447	2.5	4.45779
1359	LA3963xLA3977			0	2.14741
1360	LA3963xLA3977	0.242188	0.51453	0	2.34966
1361	LA3948xLA3977	0.884921	1.22469	44.5	13.206
1362	LA3948xLA3977	0.81408	1.12499	40.5	12.6806
1363	LA3948xLA3977	0.620192	0.906779	37	12.5137
1364	LA3948xLA3977	0.902439	1.25313	3.5	2.88547
1365	LA3948xLA3977	0.556034	0.841551	19	8.68661
1366	LA3948xLA3977	0.758658	1.05725	46.5	13.9806
1367	LA3939xLA3977	0.839679	1.15884	37	11.9098
1368	LA3939xLA3977	0.873434	1.20707	0	0.690603
1369	LA3939xLA3977	0.961828	1.37415	19	7.4107
1370	LA3939xLA3977	0.747716	1.04456	30.5	10.8418
1371	LA3939xLA3977	0.932584	1.30814	1	1.44847
1372	LA3939xLA3977	0.929192	1.30145	2.5	2.30651
1373	LA3915xLA3977	0.333333	0.61548	0	2.10782
1374	LA3915xLA3977	0.46	0.745355	10	6.43828
1375	LA3915xLA3977	0.481122	0.766516	0	1.746
1376	LA3915xLA3977	0.563213	0.848781	0	1.54892
1377	LA3915xLA3977	0.825269	1.13954	8.5	5.01734
1378	LA3915xLA3977	0	0	40	15.2783
1497	LA3975xLA3957	0.940826	1.32507	23	8.49549
1498	LA3975xLA3957	0.466667	0.75204
1499	LA3975xLA3957			2	2.30761
1500	LA3975xLA3957	0.969332	1.39477	59.5	15.4819
1501	LA3975xLA3957	0.931989	1.30696	42	12.5341
1502	LA3950xLA3975	0.674271	0.963406	15.5	7.49095
1503	LA3950xLA3975			21.5	9.03264
1504	LA3950xLA3975			40	12.9967
1505	LA3950xLA3975	0.445783	0.731074	34	12.326
1506	LA3950xLA3975	0.529762	0.815178	22.5	9.59936
1507	LA3950xLA3975	0.928465	1.30004
1508	LA3935xLA3968	0.518657	0.804059	13	7.18483
1509	LA3935xLA3968	0.335526	0.617804	14.5	8.04853
1510	LA3935xLA3968	0.83102	1.14717	6.5	4.31702
1511	LA3935xLA3968	0.49359	0.778988	34.5	12.3138
1512	LA3935xLA3968			19.5	8.82188
1513	LA3935xLA3956	0.465309	0.750679	1	2.78394
1514	LA3935xLA3956	0.79823	1.10494	11	5.88135
1515	LA3935xLA3956	0.459647	0.745002	36.5	12.801
1516	LA3935xLA3956	0.371804	0.655754	0.5	2.6413
1517	LA3950xLA3935	0.357143	0.640522
1518	LA3950xLA3935	0.883333	1.22221	39.5	12.2527
1519	LA3950xLA3935	0.66378	0.952258	23	9.38861
1520	LA3950xLA3935	0.501014	0.786412
1522	LA3950xLA3935	0.819555	1.13207	12.5	6.25636
1523	LA3935xLA3931	0.297468	0.576874	25	10.7502
1524	LA3935xLA3931	0.47	0.75538	23	9.86025
1525	LA3964xLA3943	0.444444	0.729728	0	1.83413
1526	LA3964xLA3943	0.883023	1.22173	38.5	12.0573
1527	LA3964xLA3943			32	11.2253
1528	LA3964xLA3943	0.431452	0.716633	0	1.8655
1529	LA3964xLA3943	0.897817	1.24543	78	18.8543
1530	LA3964xLA3943	0.848837	1.17147	40	12.472
1531	LA3950xLA3943	0.739828	1.03553	13	6.63032
1532	LA3950xLA3943	1	1.5708	28	9.04012
1533	LA3950xLA3943	0.515625	0.801026	8	5.66333
1534	LA3950xLA3943	0.451677	0.737	17	8.4282
1535	LA3950xLA3943	0.691531	0.981952	7	4.8892
1536	LA3950xLA3943	0.389961	0.674451
1537	LA3963xLA3943	0.471014	0.756396	57	16.5812
1538	LA3963xLA3943	0.659224	0.947444	13	6.84134
1539	LA3963xLA3943	0.854394	1.17929
1540	LA3963xLA3943	0.666667	0.955317	30.5	11.0556
1541	LA3963xLA3943	0	0	22.5	11.5522
1542	LA3963xLA3943	0.664549	0.953073	33.5	11.691
1543	LA3935xLA3915	0.838472	1.1572	0	0.810069
1545	LA3935xLA3915	0.679118	0.968587	31.5	11.236
1546	LA3935xLA3915	0.378049	0.662204	24.5	10.4314
1547	LA3935xLA3915			0	1.33359
1548	LA3935xLA3915	0.677335	0.966679	3	3.34657
1549	LA3943xLA3915	0.928119	1.29937	107.5	23.078
1550	LA3943xLA3915	0.679847	0.969368	31.5	11.2341
1551	LA3943xLA3915	0.668387	0.957143	63	17.1222
1552	LA3943xLA3915	0.8698	1.20164	93	21.2305
1553	LA3943xLA3915			0	0.930619
1554	LA3947xLA3977	0.326029	0.607711	14.5	8.07271
1555	LA3947xLA3977			29.5	10.9096
1556	LA3947xLA3977	0.777839	1.07999	60	16.3212
1557	LA3947xLA3977	0.788073	1.0924	2	2.5527
1558	LA3947xLA3977			11.5	6.45711
1560	LA3931xLA3977	0.451154	0.736474	13	7.34674
1561	LA3931xLA3977	0.610417	0.896733	0	1.43405
1562	LA3931xLA3977	0.446571	0.731867	0	1.829
1563	LA3931xLA3977	0.904255	1.25621	3.5	2.87811
1564	LA3931xLA3977	0.104487	0.329156	2	4.38114
1565	LA3931xLA3977	0.153061	0.401968	0	2.61931
