# Supplementary material for: Pervasive antagonistic interactions among hybrid incompatibility loci
Source: PLOS journal article supplement (doi:10.1371/journal.pgen.1006817), 2017-06-12

### Uncorrected

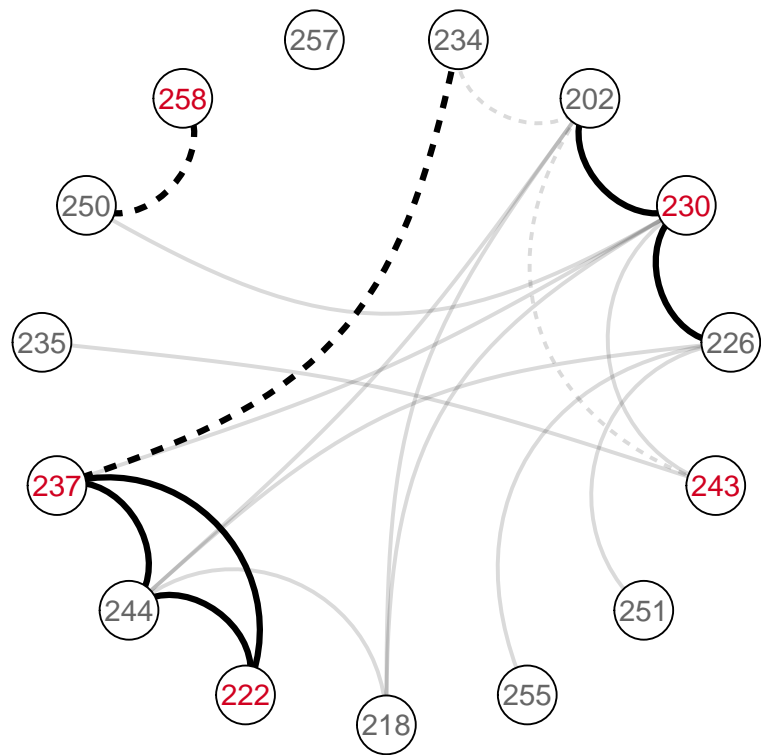

### Pollen-corrected

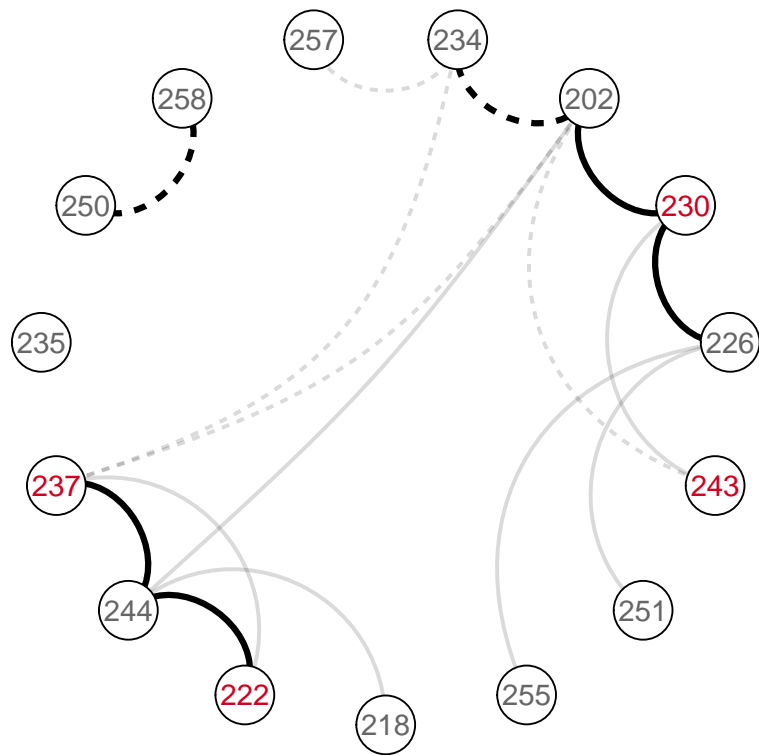

Supplement: S6 (10.1371/journal.pgen.1006817.s006) [file journal.pgen.1006817.s006]
